# Supplementary material for: Quantitative Protein Profiling of Chlamydia trachomatis Growth Forms Reveals Defense Strategies Against Tryptophan Starvation
Source: PubMed Central journal article supplement (PMC5141270; doi:10.1074/mcp.m116.061986), 2016-10-26
Supplement: 10.1074_M116.061986_mcp.M116.061986-4.pdf [file 10.1074_M116.061986_mcp.M116.061986-4.pdf]

**Supplemental Table 3.** Functional enrichment of differentially abundant proteins. Significantly enriched (*Fisher's* exact p-value <0.05) functional categories are indicated.

| Functional category                                            | Proteins                                                                                                                                                                          | Changed in category | Total in category | Fold enrichment | Fisher's exact <i>p</i> -value |
|----------------------------------------------------------------|-----------------------------------------------------------------------------------------------------------------------------------------------------------------------------------|---------------------|-------------------|-----------------|--------------------------------|
| <b><u>RB&gt;EB</u></b>                                         |                                                                                                                                                                                   |                     |                   |                 |                                |
| Translation <sup>a</sup>                                       | RplA, RplB, RplD, RplE, RplF, RplI, RplJ, RplK, RplL, RplM, RplN, RplO, RplP, RplQ, RplR, RplT, RplW, RplY, RpmE2, RpsD, RpsE, RpsG, RpsI, RpsM, RpsP, Efp2, InfC, LeuS, Rrf, Tsf | 30                  | 108               | 2.0             | <10 <sup>-4</sup>              |
| Inclusion membrane proteins <sup>b</sup>                       | IncA, IncG, Ct147, Ct223, Ct228, Ct229, Ct249, Ct618                                                                                                                              | 8                   | 21                | 2.7             | 0.0051                         |
| <b><u>RB&lt;EB</u></b>                                         |                                                                                                                                                                                   |                     |                   |                 |                                |
| Cell envelope. Membranes, lipoproteins and porins <sup>a</sup> | MOMP, OmcB, OmpB, PmpB, PmpE, PmpF, PmpG, PmpH                                                                                                                                    | 8                   | 18                | 5.5             | <10 <sup>-4</sup>              |
| Carbohydrate metabolism <sup>c</sup>                           | FbaB, GlgP, PckG, Pgi, Pgi, Pyk, SucA, Tal                                                                                                                                        | 8                   | 45                | 2.2             | 0.0209                         |
| Structural components of T3SS <sup>d</sup>                     | CdsC, CdsD, CdsF, CdsJ, CdsQ, CdsV, CopB                                                                                                                                          | 7                   | 13                | 6.7             | <10 <sup>-4</sup>              |
| <b><u>ARB&gt;EB</u></b>                                        |                                                                                                                                                                                   |                     |                   |                 |                                |
| Translation <sup>a</sup>                                       | RplA, RplC, RplD, RplE, RplF, RplI, RplJ, RplK, RplL, RplM, RplN, RplO, RplP, RplQ, RplR, RplT, RplW, RplY, RpmE2, RpsD, RpsE, RpsG, RpsI, RpsM, RpsP, HisS, InfC, Mip            | 28                  | 108               | 1.7             | 0.0011                         |
| Inclusion membrane proteins <sup>b</sup>                       | IncA, IncG, Ct147, Ct223, Ct228, Ct229, Ct249, Ct529, Ct618                                                                                                                       | 9                   | 21                | 2.8             | 0.0019                         |
| <b><u>ARB&lt;EB</u></b>                                        |                                                                                                                                                                                   |                     |                   |                 |                                |
| Cell envelope. Membranes, lipoproteins and porins <sup>a</sup> | MOMP, OmcB, OmpB, PmpB, PmpE, PmpF, PmpG, PmpH                                                                                                                                    | 8                   | 18                | 5.0             | <10 <sup>-4</sup>              |
| Carbohydrate metabolism <sup>c</sup>                           | FbaB, Gap, GlgP, Gnd, Mdh, PckG, PdhC, Pgi, Pyk, SucA, Tal                                                                                                                        | 11                  | 45                | 2.8             | 0.0009                         |
| Structural components of T3SS <sup>d</sup>                     | CdsC, CdsD, CdsF, CdsJ, CdsQ, CdsV, CopB                                                                                                                                          | 7                   | 13                | 6.1             | <10 <sup>-4</sup>              |
| <b><u>ARB&gt;RB</u></b>                                        |                                                                                                                                                                                   |                     |                   |                 |                                |
| No enriched categories identified                              |                                                                                                                                                                                   |                     |                   |                 |                                |
| <b><u>ARB&lt;RB</u></b>                                        |                                                                                                                                                                                   |                     |                   |                 |                                |
| No enriched categories identified                              |                                                                                                                                                                                   |                     |                   |                 |                                |

<sup>a</sup>Functional category according to <http://stdgen.northwestern.edu/>

<sup>b</sup>Functional annotation based on literature (24, 25, 28)

<sup>c</sup>Functional category according to KEGG <http://www.genome.jp/kegg/>

<sup>d</sup>Functional annotation based on literature (26, 27)
